# Supplementary material for: Application of fast-scan cyclic voltammetry for the in vivo characterization of optically evoked dopamine in the olfactory tubercle of the rat brain
Source: Royal Society of Chemistry journal article supplement (doi:10.1039/c6an00196c), 2016-01-01
Supplement: c6an00196c1.pdf [file c6an00196c1.pdf]

### Electronic Supplementary Information for Analyst

#### Application of Fast-Scan Cyclic voltammetry for the *in vivo* characterization of optically evoked dopamine in the olfactory tubercle of the rat brain

Ken T. Wakabayashi<sup>1,2</sup>, Michael J. Bruno<sup>2</sup>, Caroline E. Bass<sup>2</sup>, Jinwoo Park<sup>1,2\*</sup>

Department of Biotechnical and Clinical Laboratory Sciences<sup>1</sup>, Pharmacology and Toxicology<sup>2</sup>, University at Buffalo, State University of New York, Buffalo, NY 14214

#### Supplementary Figures

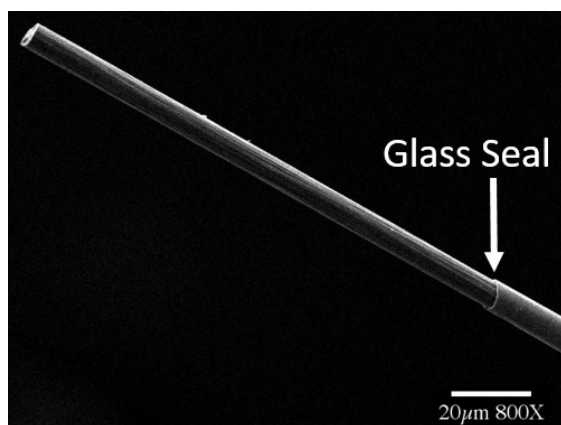

Figure S1. Scanning electron micrograph of an example CFE.

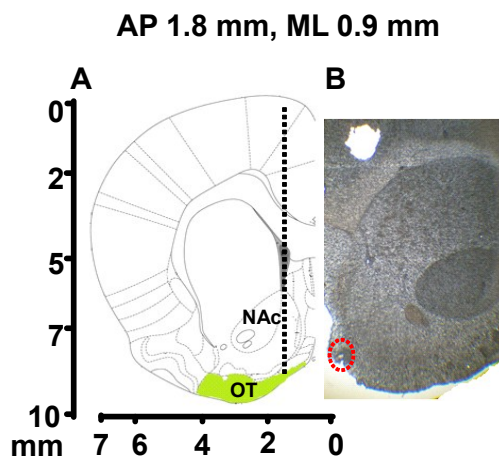

Figure S2. **A** is a coronal section (AP +1.8 mm from bregma, from Paxinos and Watson<sup>39</sup>) schematically showing the approximate path of the microelectrode (dotted line) with targets in

the NAc and OT (filled color). **B** shows a representative coronal micrograph with a lesion in the OT, highlighted with a red circle.

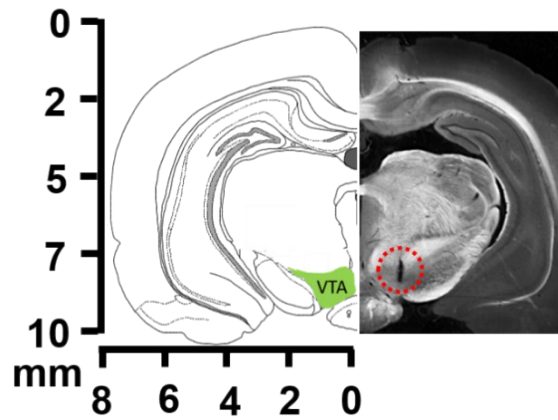

**Figure S3.** A coronal section (AP -5.2 mm from bregma, from Paxinos and Watson<sup>39</sup>) shows a schematic (left) of a coronal micrograph (right) with a representative placement of an optrode in the VTA, highlighted with a red circle.
